# Supplementary material for: Cross-sectional evolution of pain management policies and practices in Portuguese pediatric emergency departments
Source: medRxiv preprint, doi:10.1101/2022.07.06.22277222, version 1 (2022-07-08)
Supplement: Questionnaire [file 277222_file04.docx]

Questionnaire – Management of pediatric pain in the pediatric emergency department

Dear colleague,

We ask for 10 minutes of your time to answer this questionnaire.

We have the goal of exploring the actual practices of pain management in national pediatric emergency departments. To do so, I send you this questionnaire which I would like you to respond accordingly.

This questionnaire was already sent in 2007 and the results presented in March of the same year at the second meeting of the pediatric department of Hospital Prof. Dr. Fernando Fonseca.

Your participation is totally voluntary and without any kind of prejudice if you decide to not participate. The information shared will be protected and exclusively accessed by the team from the study. Every professionals of this team are restricted by professional secrecy.

Thank you for your time. Please, if you have any questions or need any additional information, feel free to contact us:

André Garrido – Pediatric Resident – [andre.garrido@hff.min-saude.pt](mailto:andre.garrido@hff.min-saude.pt)
Clara Abadesso – Pediatrician – [clara.s.abadesso@hff.min-saude.pt](mailto:clara.s.abadesso@hff.min-saude.pt) 

Email

____________________________________________

What is your role in the pediatric emergency department (PED)?

Physician – the head physician

Nurse – the nurse manager

Which is your hospital?

___________________________________________

Hospital type:

General hospital

Pediatric hospital

Average number of PED visits:

_______________________

Which type of physicians work at your PED?

Pediatricians

Pediatric residents

General practitioner

Others

Pain Protocol and Assessment

Is there a protocol for pain management at your PED?

Yes

No

If yes, for how long?

______________________

Is analgesia done in triage?

Yes

No

How frequently is pain assessed at your PED?

Always

> 50% of the times

< 50% of the times

Never

Who assesses pain?

The nurse from triage

The physician

How is it done?

Nurse’s impression

Physician’s impression

Parent’s impression

Pain assessment scale

Other

Which pain assessment scales are used?

______________________________________________________________________

Is pain reassessed after analgesia?

Yes

No

Analgesia for Different Types and Presentations of Pain

How frequently is analgesia done for mild to moderate pain?

Always

> 50% of the times

< 50% of the times

Never

Which drugs are used to do it?

Paracetamol

Ibuprofen

Diclofenac

Ketorolac

Dipyrone

Other NSAIDs

Tramadol

Morphine

Fentanyl

Other opioids

Other

How frequently is analgesia done for severe pain?

Always

> 50% of the times

< 50% of the times

Never

Which drugs are used to do it?

Paracetamol

Ibuprofen

Diclofenac

Ketorolac

Dipyrone

Other NSAIDs

Tramadol

Morphine

Fentanyl

Other opioids

Other

How frequently is analgesia done for abdominal pain?

Always

> 50% of the times

< 50% of the times

Never

Which drugs are used?

Paracetamol

Ibuprofen

Diclofenac

Ketorolac

Dipyrone

Other NSAIDs

Tramadol

Morphine

Fentanyl

Other opioids

Other

How frequently is analgesia done for articular pain?

Always

> 50% of the times

< 50% of the times

Never

Which drugs are used?

Paracetamol

Ibuprofen

Diclofenac

Ketorolac

Dipyrone

Other NSAIDs

Tramadol

Morphine

Fentanyl

Other opioids

Other

How frequently is analgesia done for bone fracture associated pain?

Always

> 50% of the times

< 50% of the times

Never

Which drugs are used?

Paracetamol

Ibuprofen

Diclofenac

Ketorolac

Dipyrone

Other NSAIDs

Tramadol

Morphine

Fentanyl

Other opioids

Other

How frequently is analgesia done for politrauma associated pain?

Always

> 50% of the times

< 50% of the times

Never

Which drugs are used?

Paracetamol

Ibuprofen

Diclofenac

Ketorolac

Dipyrone

Other NSAIDs

Tramadol

Morphine

Fentanyl

Other opioids

Other

How frequently is analgesia done for burn associated pain?

Always

> 50% of the times

< 50% of the times

Never

Which drugs are used?

Paracetamol

Ibuprofen

Diclofenac

Ketorolac

Dipyrone

Other NSAIDs

Tramadol

Morphine

Fentanyl

Other opioids

Other

Procedural Analgesia and Sedation

Is sucrose used for painful procedures in infants <6 months years old?

Yes

No

Is EMONO used for procedural sedoanalgesia?

Yes

No

Is EMLA® used for procedural analgesia?

Yes

No

Is local analgesia done for intramuscular injections?

Yes

No

How frequently is analgesia done for venopuncture?

Always

> 50% of the times

< 50% of the times

Never

What kind of analgesia is used in these situations?

________________________________________________________________

How frequently is analgesia done for lumbar puncture?

Always

> 50% of the times

< 50% of the times

Never

What kind of analgesia is used in these situations?

________________________________________________________________

How frequently is sedation done for lumbar puncture?

Always

> 50% of the times

< 50% of the times

Never

Which drugs do you use for lumbar puncture sedations?

________________________________________________________________

How frequently is analgesia done for fracture reductions?

Always

> 50% of the times

< 50% of the times

Never

What kind of analgesia is used in these situations?

________________________________________________________________

How frequently is sedation done for fracture reductions?

Always

> 50% of the times

< 50% of the times

Never

Which drugs do you use for these sedations?

________________________________________________________________

Where are fracture reductions done?

Orthopedic emergency department

PED

Other

How frequently is analgesia done for wound disinfection and suture?

Always

> 50% of the times

< 50% of the times

Never

What kind of analgesia is used in these situations?

________________________________________________________________

How frequently is sedation done for wound disinfection and suture?

Always

> 50% of the times

< 50% of the times

Never

Which drugs do you use for these sedations?

________________________________________________________________

Where are wound disinfections and sutures done?

Surgery emergency department

PED

Other

Who is responsible for the IV procedural sedoanalgesia?

Pediatrician

Anesthetists

Any physician

Is there support for intensivists or anesthetists moderate to profound sedation?

Yes

No

Is pre-sedation risk evaluated?

Yes

No

Is pre-sedation risk, monitoring and drugs used registered after the procedure?

Yes

No

General Use of Opioids

Opioid prescription is done by:

Any physician of the PED

Only pediatricians

Only with the intensivists or anesthetists support

Other

Non-Pharmacological Interventions

Are non-pharmacological interventions used?

Yes

No

How frequently is forced immobilization used?

Always

> 50% of the times

< 50% of the times

Never

How frequently are parents present for procedures?

Always

> 50% of the times

< 50% of the times

Never

How frequently is the parent’s lap used?

Always

> 50% of the times

< 50% of the times

Never

Training and Adequacy of Pain Treatment

Do you think that pain is adequately managed at your PED?

Yes

No

If you do not think so, why?

Difficulty in communicating with children

Difficulty of a correct pain assessment

Inadequate methods

Lack of time

Lack of motivation

Lack of material

Inadequate medical prescriptions

Medical inexperience in prescribing analgesics

Fear of hiding symptoms and signs

Fear of opioid side effects

Insufficient child and parents’ information

Insufficient staff knowledge of how to manage pain

Procedures are too quick, they don’t need analgesia

Pain is natural, we should not treat it every time

Other

If you responded “other”, please specify it

___________________________________________________________________

Do you think that your staff should have more training of in pain management?

Yes

No

Comments

___________________________________________________________________
